# Supplementary material for: European clinical guidelines for Tourette syndrome and other tic disorders—version 2.0. Part II: psychological interventions
Source: Springer Nature journal article supplement (doi:10.1007/s00787-021-01845-z), 2021-07-27
Supplement: MOESM1 [file 19395674]

# European clinical guidelines for Tourette syndrome and other tic disorders—version 2.0. Part II: psychological interventions

## European Child & Adolescent Psychiatry

Per Andrén, Ewgeni Jakubovski, Tara L. Murphy, Katrin Woitecki, Zsanett Tarnok, Sharon Zimmerman-Brenner, Jolande van de Griendt, Nanette Mol Debes, Paula Viefhaus, Sally Robinson, Veit Roessner, Christos Ganos, Natalia Szejko, Kirsten Müller-Vahl, Danielle Cath, Andreas Hartmann, Cara Verdellen

**Correspondence to:** Per Andrén, Clinical psychologist, MSc; Karolinska Institutet, Department of Clinical Neuroscience Child and Adolescent Psychiatry Research Center, Gävlegatan 22, 113 30 Stockholm, Sweden; E-mail: per.andren@ki.se

## Online Resource 1

This search strategy was used to identify relevant studies.

Ovid search strategy from June 6, 2019

| #  | Searches                                                                                                                     | Results |
|----|------------------------------------------------------------------------------------------------------------------------------|---------|
| 1  | tic disorders/ or tourette syndrome/                                                                                         | 8252    |
| 2  | Telemedicine/                                                                                                                | 24269   |
| 3  | 1 and 2                                                                                                                      | 5       |
| 4  | from 3 keep 1                                                                                                                | 1       |
| 5  | Psychotherapy, Group/                                                                                                        | 13591   |
| 6  | psychotherapy/ or behavior therapy/ or cognitive behavioral therapy/ or "acceptance and commitment therapy"/ or mindfulness/ | 174547  |
| 7  | habit reversal.ti,ab,kw.                                                                                                     | 596     |
| 8  | Comprehensive Behavioral Intervention.ti,ab,kw.                                                                              | 97      |
| 9  | "exposure and response prevention".ti,ab,kw.                                                                                 | 1311    |
| 10 | 5 or 6                                                                                                                       | 183025  |
| 11 | 7 or 8 or 9                                                                                                                  | 1947    |
| 12 | 1 and 10                                                                                                                     | 399     |
| 13 | 11 and 12                                                                                                                    | 108     |
| 14 | Attention Deficit Disorder with Hyperactivity/                                                                               | 50744   |
| 15 | Autistic Disorder/                                                                                                           | 19472   |

|        |                                                                        |        |
|--------|------------------------------------------------------------------------|--------|
| 1<br>6 | Obsessive-Compulsive Disorder/                                         | 27116  |
| 1<br>7 | Comorbidity/                                                           | 129896 |
| 1<br>8 | 14 or 15 or 16 or 17                                                   | 217267 |
| 1<br>9 | 1 and 18                                                               | 2437   |
| 2<br>0 | 13 or 19                                                               | 2520   |
| 2<br>1 | tourette syndrome/                                                     | 7213   |
| 2<br>2 | telemedicine/ or online therapy/ or telepsychiatry/ or telepsychology/ | 26640  |
| 2<br>3 | 21 and 22                                                              | 6      |
| 2<br>4 | group psychotherapy/ or psychotherapy/                                 | 133639 |
| 2<br>5 | behavior therapy/                                                      | 40426  |
| 2<br>6 | cognitive behavior therapy/ or "acceptance and commitment therapy"/    | 42994  |
| 2<br>7 | 24 or 25 or 26                                                         | 207113 |
| 2<br>8 | habit reversal.ti,ab,id.                                               | 617    |
| 2<br>9 | Comprehensive Behavioral Intervention.ti,ab,id.                        | 103    |
| 3<br>0 | "exposure and response prevention".ti,ab,id.                           | 1320   |
| 3<br>1 | 28 or 29 or 30                                                         | 1978   |
| 3<br>2 | 21 and 27                                                              | 355    |
| 3<br>3 | 31 and 32                                                              | 108    |
| 3<br>4 | attention deficit disorder with hyperactivity/                         | 50744  |
| 3<br>5 | autism spectrum disorders/                                             | 46708  |
| 3<br>6 | obsessive compulsive disorder/                                         | 27116  |
| 3<br>7 | comorbidity/                                                           | 129896 |
| 3<br>8 | 34 or 35 or 36 or 37                                                   | 242830 |
| 3<br>9 | 21 and 38                                                              | 2079   |
| 4<br>0 | 4 or 13 or 20                                                          | 2521   |
| 4<br>1 | 23 or 33 or 39                                                         | 2162   |
| 4<br>2 | 4 use medall                                                           | 1      |
| 4<br>3 | 13 use medall                                                          | 61     |

|        |                                  |            |
|--------|----------------------------------|------------|
| 4<br>4 | 20 use medall                    | 1612       |
| 4<br>5 | 42 or 43 or 44                   | 1613       |
| 4<br>6 | 23 use psyh                      | 5          |
| 4<br>7 | 33 use psyh                      | 66         |
| 4<br>8 | 39 use psyh                      | 940        |
| 4<br>9 | 46 or 47 or 48                   | 992        |
| 5<br>0 | 45 or 49                         | 2605       |
| 5<br>1 | limit 50 to yr="2017 -Current"   | 153        |
| 5<br>2 | <b>remove duplicates from 51</b> | <b>132</b> |
